# Supplementary material
Source: publisher figshare collection journal article supplement (https://acs.figshare.com/ndownloader/files/24168845)
Supplement: Supplementary file 1 [file 24168845]

## **Supplementary Materials**

### **Immobilization of pectinase onto porous hydroxyapatite/calcium alginate composite beads for improved performance of recycle**

Danping Qi<sup>†</sup>   Min Gao<sup>†</sup>   Xiaoyuan Li<sup>†</sup>   Jiangli Lin<sup>\*,†</sup>

<sup>†</sup> Key Laboratory of Oil and Gas Fine Chemicals, Ministry of Education & Xinjiang Uyghur Autonomous Region, College of Chemistry and Chemical Engineering, Xinjiang university, Urumqi, 830046, China

#### **Corresponding author**

Jiangli Lin,

E-mail: Linjiangli421@163.com

## **Contents**

**Figure S1** XRD results of the HAp powder samples heat-treated at 950°C (JCPDS card Number: 09-0432, Hydroxyapatite, syn.,  $\text{Ca}_5(\text{PO}_4)_3(\text{OH})$ ).

**Figure S2** Pore diameter distribution curves of the porous HAp determined by BET.

**Figure S1** XRD results of the HApA powder samples heat-treated at 950°C (JCPDS card Number: 09-0432, Hydroxyapatite, syn.,  $\text{Ca}_5(\text{PO}_4)_3(\text{OH})$ )

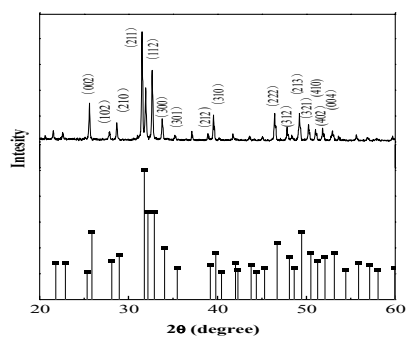

**Figure S2** Pore diameter distribution curves of the porous HAp determined by BET

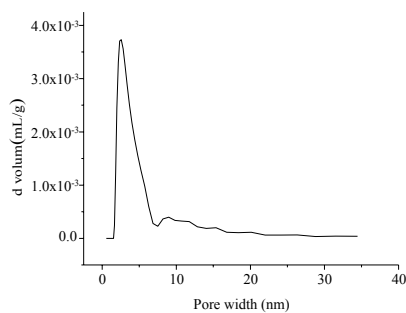

| parameter             | Average pore  | surface area              | porous volume              |
|-----------------------|---------------|---------------------------|----------------------------|
|                       | diameter (nm) | ( $\text{m}^2/\text{g}$ ) | ( $\text{cm}^3/\text{g}$ ) |
| porous hydroxyapatite | 7.20          | 8.3                       | 0.2                        |
